# Supplementary material
Source: publisher site journal article supplement (https://www.dovepress.com/article/297943)
Supplement: Supplementary file 1 [file get_supplementary_file.php]

Table S1: Baseline characteristics of 15,920 COPD patients without a concurrent asthma diagnosis stratified by exacerbation frequency

| **Variable** | **Annual exacerbation rate 2 years prior to index date** | | | **p-value** |
| --- | --- | --- | --- | --- |
| **0  (N=7,148)**  **(44.9%)** | **1  (N=3,529)**  **(22.2%)** | **≥2  (N=5,243)**  **(32.9%)** |
| Age (years) | 68.2 | 69.0 | 69.7 |  |
| Female | 3600 (50.4) | 1859 (52.3) | 2914 (55.6) |  |
| **Comorbidity** |  |  |  |  |
| Charlson Comorbidity Index value | 1.4 | 1.5 | 1.7 | <0.0001 |
| Cardiovascular Disease, I00-I99 | 2406 (33.7) | 1261 (35.7) | 2069 (39.5) | <0.0001 |
| Hypertension, I10 | 1422 (19.9) | 731 (20.7) | 1205 (23.0) | <0.0001 |
| Heart failure, I50 | 469 (6.6) | 270 (7.7) | 461 (8.8) | <0.0001 |
| Ischemic heart diseases, I20-I25 | 619 (8.7) | 345 (9.8) | 562 (10.7) | <0.0001 |
| Cerebrovascular diseases, I60-I69 | 277 (3.9) | 153 (4.3) | 226 (4.3) | 0.2097 |
| Diabetes Type I, E10 | 91 (1.3) | 70 (2.0) | 91 (1.7) | 0.0285 |
| Diabetes Type II, E11 + E13 | 392 (5.5) | 221 (6.3) | 432 (8.2) | <0.0001 |
| Depression, F32 + F33 | 330 (4.6) | 177 (5.0) | 274 (5.2) | 0.1159 |
| Anxiety, F40 + F41 | 223 (3.1) | 147 (4.2) | 198 (3.8) | 0.0357 |
| Osteoporosis, M80 + M81 | 106 (1.5) | 72 (2.0) | 140 (2.7) | <0.0001 |
| Fractures, S2 | 386 (5.4) | 217 (6.2) | 363 (6.9) | 0.0004 |
| Lung Cancer, C34 | 54 (0.8) | 33 (0.9) | 84 (1.6) | <0.0001 |
| **Treatment** |  |  |  |  |
| ICS in any combination | 1027 (14.4) | 691 (19.6) | 1581 (30.2) | <0.0001 |
| LABA in any combination | 826 (11.6) | 565 (16.0) | 1315 (25.1) | <0.0001 |
| LAMA in any combination | 646 (9.0) | 455 (12.9) | 986 (18.8) | <0.0001 |
| SABA | 789 (11.0) | 498 (14.1) | 1174 (22.4) | <0.0001 |
| SABA + SAMA | 38 (0.5) | 19 (0.5) | 49 (0.9) | 0,014 |
| SAMA | 201 (2.8) | 144 (4.1) | 354 (6.8) | <0.0001 |
| **Health care utilization** | | | | |
| Number of times at hospital/year, any reason | 0.40 | 0.48 | 0.64 | <.0001 |
| Number of out hospital visits/year | 1.37 | 1.61 | 2.22 | <.0001 |
| Number of contacts to primary care/year# | 8.48 | 8.62 | 9.46 | 0.0025 |
| Patients with overnight stays (%) | 1933 (27.0) | 1119 (31.7) | 2028 (38.7) | <.0001 |
| Patients with contacts to primary care (%) | 5269 (73.7) | 2546 (72.1) | 3397 (64.8) | <.0001 |

#Contacts with primary care is any contact including physical visit, phone contact, laboratory visit, electronic contacts to any type of staff physician, nurse and lab technician.

Age, gender, co-morbidity, health care utilization and drug treatment at baseline, i.e. two years prior to index date. Group assignment is based on annual exacerbations rate two 2 years prior to index date (patients may move between the groups during follow-up). Treatment “in any combination” includes both drugs taken alone and in combination with other drugs, separately and in fixed combinations. Results are presented as n and percent within brackets. P-values indicate differences between the groups.

**Abbreviations:** ICS, Inhaled steroids; LABA, Long-acting beta-agonists; LAMA, Long-acting antimuscarinics; SABA, Short-acting beta-agonists; SAMA, Short-acting antimuscarinics

Table S2: Lung function measurements of COPD patients (without asthma at baseline) stratified by exacerbation rate

| **Variable** |  | **Annual exacerbation rate 2 years prior to index date** | | |
| --- | --- | --- | --- | --- |
| **0 exacerbation** | **1 exacerbation** | **>1 exacerbation** |
| FEV1 after bronchodilation | Mean (95 % CI) | 1.9 (1.8, 1.9) | 1.8 (1.7, 1.8) | 1.7 (1.7, 1.8) |
| N | 2468 | 1144 | 1404 |
| FVC after bronchodilation | Mean (95 % CI) | 2.9 (2.8, 2.9) | 2.7 (2.7, 2.8) | 2.7 (2.7, 2.8) |
| N | 2354 | 1095 | 1331 |
| FEV/FCV ratio in percent after bronchodilation | Mean (95 % CI) | 59.9 (59.2, 60.7) | 60.4 (59.3, 61.5) | 58.6 (57.5, 59.6) |
| N | 2482 | 1156 | 1432 |
| FEV1 % predicted after bronchodilation | Mean (95 % CI) | 65.1 (64.4, 65.9) | 63.0 (62.0, 64.1) | 61.1 (60.1, 62.1) |
| N | 2869 | 1376 | 1704 |
| FVC % predicted after bronchodilation | Mean (95 % CI) | 76.8 (76.1, 77.6) | 74.6 (73.5, 75.6) | 73.3 (72.3, 74.3) |
| N | 2680 | 1283 | 1563 |

*Lung function values are the ones closest to index, either before or after

**Abbreviations:** CI, Confidence Interval; FEV1, Forced Expiratory Volume in one second; FVC, Forced Vital Capacity
